# Supplementary material for: Deep Learning-Based Classification of GAD67-Positive Neurons Without the Immunosignal
Source: PubMed Central journal article supplement (PMC8044854; doi:10.3389/fnana.2021.643067), 2021-03-31
Supplement: Data_Sheet_1.pdf [file Data_Sheet_1.pdf]

# Yamashiro *et al.*, Supplementary Materials

## Contents

- Supplementary Table 1  
Metrics of classification performance of the FCN-based model for S1. Pages 1-2
  
- Supplementary Table 2  
Metrics of classification performance of the PCA-SVM model for S1. Pages 3-4
  
- Supplementary Table 3  
Metrics of classification performance of the FCN-based model for M1. Pages 5-6
  
- Supplementary Table 4  
Metrics of classification performance of the PCA-SVM model for M1. Pages 7-8
  
- Supplementary Figure 1  
Representative photographs of GAD67 and GABA immunoreactivity in S1 and M1. Page 9
  
- Supplementary Figure 2  
Differences in the immunofluorescence and shape of GAD67-positive and GAD67-negative cells in S1 as manually annotated or predicted by deep learning. Page 10
  
- Supplementary Figure 3  
Differences in the immunofluorescence and shape of GAD67-positive and GAD67-negative cells in M1 as manually annotated or predicted by deep learning. Page 11
  
- Supplementary Figure 4  
Representative photographs of GAD67 and NeuN immunoreactivity and Nissl reactivity in the hippocampal CA1 area. Page 12
  
- Supplementary Figure 5  
Representative photographs of GAD67 and NeuN immunoreactivity and Nissl reactivity in single neocortical cells categorized by experimenters and deep learning. Pages 13-14

*Abbreviations:* S1, primary somatosensory cortex; M1, primary motor cortex; FCN, fully convolutional network; PCA, principal component analysis; SVM, support vector machine.

**A** S1 FCN GAD67 + NeuN + Nissl

| Cross validation | Accuracy | GAD67(-) precision | GAD67(-) recall | GAD67(-) F1 score | GAD67(+) precision | GAD67(+) recall | GAD67(+) F1 score | Macro precision | Macro recall | Macro F1 score | Weighted precision | Weighted recall | Weighted F1 score |
|------------------|----------|--------------------|-----------------|-------------------|--------------------|-----------------|-------------------|-----------------|--------------|----------------|--------------------|-----------------|-------------------|
| 1                | 0.910    | 0.998              | 0.908           | 0.951             | 0.321              | 0.950           | 0.480             | 0.659           | 0.929        | 0.715          | 0.968              | 0.910           | 0.930             |
| 2                | 0.868    | 0.998              | 0.863           | 0.926             | 0.245              | 0.970           | 0.391             | 0.622           | 0.917        | 0.659          | 0.965              | 0.868           | 0.903             |
| 3                | 0.910    | 0.998              | 0.908           | 0.950             | 0.320              | 0.950           | 0.479             | 0.659           | 0.929        | 0.715          | 0.968              | 0.910           | 0.930             |
| 4                | 0.848    | 0.999              | 0.842           | 0.914             | 0.221              | 0.981           | 0.361             | 0.610           | 0.911        | 0.637          | 0.965              | 0.848           | 0.890             |
| 5                | 0.912    | 0.997              | 0.911           | 0.952             | 0.324              | 0.940           | 0.482             | 0.661           | 0.925        | 0.717          | 0.968              | 0.912           | 0.931             |
| Average          | 0.890    | 0.998              | 0.886           | 0.939             | 0.286              | 0.958           | 0.439             | 0.642           | 0.922        | 0.689          | 0.967              | 0.890           | 0.917             |

**B** S1 FCN NeuN + Nissl

| Cross validation | Accuracy | GAD67(-) precision | GAD67(-) recall | GAD67(-) F1 score | GAD67(+) precision | GAD67(+) recall | GAD67(+) F1 score | Macro precision | Macro recall | Macro F1 score | Weighted precision | Weighted recall | Weighted F1 score |
|------------------|----------|--------------------|-----------------|-------------------|--------------------|-----------------|-------------------|-----------------|--------------|----------------|--------------------|-----------------|-------------------|
| 1                | 0.818    | 0.991              | 0.817           | 0.896             | 0.173              | 0.840           | 0.287             | 0.582           | 0.828        | 0.591          | 0.955              | 0.818           | 0.869             |
| 2                | 0.859    | 0.990              | 0.861           | 0.921             | 0.209              | 0.803           | 0.332             | 0.600           | 0.832        | 0.627          | 0.956              | 0.859           | 0.895             |
| 3                | 0.834    | 0.991              | 0.835           | 0.906             | 0.186              | 0.829           | 0.304             | 0.589           | 0.832        | 0.605          | 0.956              | 0.834           | 0.880             |
| 4                | 0.767    | 0.992              | 0.763           | 0.863             | 0.143              | 0.868           | 0.246             | 0.568           | 0.816        | 0.554          | 0.955              | 0.767           | 0.836             |
| 5                | 0.870    | 0.989              | 0.874           | 0.928             | 0.222              | 0.784           | 0.346             | 0.605           | 0.829        | 0.637          | 0.955              | 0.870           | 0.903             |
| Average          | 0.830    | 0.991              | 0.830           | 0.903             | 0.187              | 0.825           | 0.303             | 0.589           | 0.828        | 0.603          | 0.955              | 0.830           | 0.876             |

**C** S1 FCN GAD67 + Nissl

| Cross validation | Accuracy | GAD67(-) precision | GAD67(-) recall | GAD67(-) F1 score | GAD67(+) precision | GAD67(+) recall | GAD67(+) F1 score | Macro precision | Macro recall | Macro F1 score | Weighted precision | Weighted recall | Weighted F1 score |
|------------------|----------|--------------------|-----------------|-------------------|--------------------|-----------------|-------------------|-----------------|--------------|----------------|--------------------|-----------------|-------------------|
| 1                | 0.883    | 0.997              | 0.880           | 0.935             | 0.265              | 0.944           | 0.414             | 0.631           | 0.912        | 0.674          | 0.965              | 0.883           | 0.912             |
| 2                | 0.927    | 0.994              | 0.930           | 0.961             | 0.361              | 0.868           | 0.510             | 0.677           | 0.899        | 0.735          | 0.966              | 0.927           | 0.941             |
| 3                | 0.921    | 0.995              | 0.922           | 0.957             | 0.344              | 0.890           | 0.496             | 0.669           | 0.906        | 0.727          | 0.966              | 0.921           | 0.937             |
| 4                | 0.912    | 0.996              | 0.912           | 0.952             | 0.322              | 0.911           | 0.476             | 0.659           | 0.912        | 0.714          | 0.966              | 0.912           | 0.931             |
| 5                | 0.903    | 0.997              | 0.901           | 0.947             | 0.303              | 0.935           | 0.457             | 0.650           | 0.918        | 0.702          | 0.966              | 0.903           | 0.925             |
| Average          | 0.909    | 0.996              | 0.909           | 0.950             | 0.319              | 0.910           | 0.471             | 0.657           | 0.909        | 0.710          | 0.966              | 0.909           | 0.929             |

**D** S1 FCN GAD67 + NeuN

| Cross validation | Accuracy | GAD67(-) precision | GAD67(-) recall | GAD67(-) F1 score | GAD67(+) precision | GAD67(+) recall | GAD67(+) F1 score | Macro precision | Macro recall | Macro F1 score | Weighted precision | Weighted recall | Weighted F1 score |
|------------------|----------|--------------------|-----------------|-------------------|--------------------|-----------------|-------------------|-----------------|--------------|----------------|--------------------|-----------------|-------------------|
| 1                | 0.913    | 0.996              | 0.913           | 0.953             | 0.326              | 0.927           | 0.483             | 0.661           | 0.920        | 0.718          | 0.967              | 0.913           | 0.932             |
| 2                | 0.906    | 0.996              | 0.905           | 0.949             | 0.309              | 0.924           | 0.463             | 0.652           | 0.915        | 0.706          | 0.966              | 0.906           | 0.927             |
| 3                | 0.810    | 0.998              | 0.802           | 0.890             | 0.184              | 0.972           | 0.309             | 0.591           | 0.887        | 0.599          | 0.963              | 0.810           | 0.864             |
| 4                | 0.896    | 0.996              | 0.894           | 0.943             | 0.286              | 0.927           | 0.437             | 0.641           | 0.910        | 0.690          | 0.965              | 0.896           | 0.920             |
| 5                | 0.870    | 0.997              | 0.867           | 0.927             | 0.245              | 0.944           | 0.389             | 0.621           | 0.905        | 0.658          | 0.964              | 0.870           | 0.904             |
| Average          | 0.879    | 0.997              | 0.876           | 0.932             | 0.270              | 0.939           | 0.416             | 0.633           | 0.907        | 0.674          | 0.965              | 0.879           | 0.910             |

**E**

S1 FCN GAD67

| Cross validation | Accuracy | GAD67(-) precision | GAD67(-) recall | GAD67(-) F1 score | GAD67(+) precision | GAD67(+) recall | GAD67(+) F1 score | Macro precision | Macro recall | Macro F1 score | Weighted precision | Weighted recall | Weighted F1 score |
|------------------|----------|--------------------|-----------------|-------------------|--------------------|-----------------|-------------------|-----------------|--------------|----------------|--------------------|-----------------|-------------------|
| 1                | 0.882    | 0.990              | 0.885           | 0.935             | 0.241              | 0.795           | 0.370             | 0.615           | 0.840        | 0.652          | 0.957              | 0.882           | 0.910             |
| 2                | 0.900    | 0.991              | 0.904           | 0.945             | 0.280              | 0.816           | 0.417             | 0.636           | 0.860        | 0.681          | 0.960              | 0.900           | 0.922             |
| 3                | 0.889    | 0.993              | 0.890           | 0.939             | 0.265              | 0.870           | 0.406             | 0.629           | 0.880        | 0.672          | 0.962              | 0.889           | 0.915             |
| 4                | 0.921    | 0.992              | 0.925           | 0.957             | 0.337              | 0.834           | 0.480             | 0.664           | 0.879        | 0.719          | 0.963              | 0.921           | 0.936             |
| 5                | 0.925    | 0.991              | 0.930           | 0.960             | 0.349              | 0.816           | 0.489             | 0.670           | 0.873        | 0.724          | 0.963              | 0.925           | 0.939             |
| Average          | 0.903    | 0.991              | 0.907           | 0.947             | 0.294              | 0.826           | 0.432             | 0.643           | 0.867        | 0.690          | 0.961              | 0.903           | 0.925             |

**F**

S1 FCN NeuN

| Cross validation | Accuracy | GAD67(-) precision | GAD67(-) recall | GAD67(-) F1 score | GAD67(+) precision | GAD67(+) recall | GAD67(+) F1 score | Macro precision | Macro recall | Macro F1 score | Weighted precision | Weighted recall | Weighted F1 score |
|------------------|----------|--------------------|-----------------|-------------------|--------------------|-----------------|-------------------|-----------------|--------------|----------------|--------------------|-----------------|-------------------|
| 1                | 0.490    | 0.995              | 0.469           | 0.638             | 0.076              | 0.948           | 0.140             | 0.535           | 0.709        | 0.389          | 0.955              | 0.490           | 0.616             |
| 2                | 0.692    | 0.990              | 0.685           | 0.810             | 0.109              | 0.844           | 0.193             | 0.549           | 0.765        | 0.502          | 0.951              | 0.692           | 0.783             |
| 3                | 0.422    | 0.994              | 0.399           | 0.569             | 0.067              | 0.946           | 0.125             | 0.530           | 0.672        | 0.347          | 0.953              | 0.422           | 0.550             |
| 4                | 0.744    | 0.989              | 0.740           | 0.847             | 0.127              | 0.823           | 0.219             | 0.558           | 0.782        | 0.533          | 0.951              | 0.744           | 0.819             |
| 5                | 0.579    | 0.993              | 0.563           | 0.719             | 0.087              | 0.914           | 0.159             | 0.540           | 0.738        | 0.439          | 0.953              | 0.579           | 0.694             |
| Average          | 0.585    | 0.992              | 0.571           | 0.716             | 0.093              | 0.895           | 0.167             | 0.543           | 0.733        | 0.442          | 0.953              | 0.585           | 0.692             |

**G**

S1 FCN Nissl

| Cross validation | Accuracy | GAD67(-) precision | GAD67(-) recall | GAD67(-) F1 score | GAD67(+) precision | GAD67(+) recall | GAD67(+) F1 score | Macro precision | Macro recall | Macro F1 score | Weighted precision | Weighted recall | Weighted F1 score |
|------------------|----------|--------------------|-----------------|-------------------|--------------------|-----------------|-------------------|-----------------|--------------|----------------|--------------------|-----------------|-------------------|
| 1                | 0.702    | 0.978              | 0.704           | 0.819             | 0.092              | 0.657           | 0.162             | 0.535           | 0.681        | 0.490          | 0.939              | 0.702           | 0.790             |
| 2                | 0.655    | 0.979              | 0.653           | 0.784             | 0.084              | 0.695           | 0.150             | 0.532           | 0.674        | 0.467          | 0.940              | 0.655           | 0.756             |
| 3                | 0.655    | 0.981              | 0.653           | 0.784             | 0.086              | 0.719           | 0.154             | 0.534           | 0.686        | 0.469          | 0.942              | 0.655           | 0.756             |
| 4                | 0.647    | 0.981              | 0.644           | 0.777             | 0.085              | 0.724           | 0.152             | 0.533           | 0.684        | 0.465          | 0.942              | 0.647           | 0.750             |
| 5                | 0.644    | 0.980              | 0.641           | 0.775             | 0.083              | 0.711           | 0.149             | 0.531           | 0.676        | 0.462          | 0.941              | 0.644           | 0.748             |
| Average          | 0.661    | 0.980              | 0.659           | 0.788             | 0.086              | 0.701           | 0.153             | 0.533           | 0.680        | 0.471          | 0.941              | 0.661           | 0.760             |

### Supplementary Table 1. Metrics of classification performance of the FCN-based model for S1.

**A**, Performance of the FCN-based model using anti-GAD67, anti-NeuN, and Nissl signals in S1. **B**, The same as **A**, but using anti-NeuN and Nissl signals. **C**, The same as **A**, but using anti-GAD67 and Nissl signals. **D**, The same as **A**, but using anti-GAD67 and anti-NeuN signals. **E**, The same as **A**, but using an anti-GAD67 signal. **F**, The same as **A**, but using an anti-NeuN signal. **G**, The same as **A**, but using a Nissl signal. *Abbreviations*: S1, primary somatosensory cortex; FCN, fully convolutional network.

**A** S1 SVM GAD67 + NeuN + Nissl

| Cross validation | Accuracy | GAD67(-) precision | GAD67(-) recall | GAD67(-) F1 score | GAD67(+) precision | GAD67(+) recall | GAD67(+) F1 score | Macro precision | Macro recall | Macro F1 score | Weighted precision | Weighted recall | Weighted F1 score |
|------------------|----------|--------------------|-----------------|-------------------|--------------------|-----------------|-------------------|-----------------|--------------|----------------|--------------------|-----------------|-------------------|
| 1                | 0.539    | 0.961              | 0.540           | 0.692             | 0.049              | 0.523           | 0.090             | 0.505           | 0.531        | 0.391          | 0.921              | 0.539           | 0.665             |
| 2                | 0.575    | 0.962              | 0.579           | 0.723             | 0.052              | 0.503           | 0.094             | 0.507           | 0.541        | 0.408          | 0.922              | 0.575           | 0.695             |
| 3                | 0.596    | 0.961              | 0.602           | 0.740             | 0.051              | 0.471           | 0.093             | 0.506           | 0.536        | 0.416          | 0.922              | 0.596           | 0.712             |
| 4                | 0.598    | 0.960              | 0.605           | 0.742             | 0.050              | 0.454           | 0.090             | 0.505           | 0.529        | 0.416          | 0.921              | 0.598           | 0.713             |
| 5                | 0.567    | 0.960              | 0.571           | 0.716             | 0.049              | 0.484           | 0.089             | 0.505           | 0.527        | 0.403          | 0.920              | 0.567           | 0.689             |
| Average          | 0.575    | 0.961              | 0.579           | 0.723             | 0.050              | 0.487           | 0.091             | 0.506           | 0.533        | 0.407          | 0.921              | 0.575           | 0.695             |

**B** S1 SVM NeuN + Nissl

| Cross validation | Accuracy | GAD67(-) precision | GAD67(-) recall | GAD67(-) F1 score | GAD67(+) precision | GAD67(+) recall | GAD67(+) F1 score | Macro precision | Macro recall | Macro F1 score | Weighted precision | Weighted recall | Weighted F1 score |
|------------------|----------|--------------------|-----------------|-------------------|--------------------|-----------------|-------------------|-----------------|--------------|----------------|--------------------|-----------------|-------------------|
| 1                | 0.557    | 0.959              | 0.561           | 0.708             | 0.047              | 0.475           | 0.086             | 0.503           | 0.518        | 0.397          | 0.919              | 0.557           | 0.681             |
| 2                | 0.591    | 0.961              | 0.596           | 0.736             | 0.051              | 0.475           | 0.092             | 0.506           | 0.536        | 0.414          | 0.922              | 0.591           | 0.708             |
| 3                | 0.597    | 0.961              | 0.603           | 0.741             | 0.050              | 0.460           | 0.091             | 0.506           | 0.532        | 0.416          | 0.921              | 0.597           | 0.713             |
| 4                | 0.607    | 0.961              | 0.614           | 0.749             | 0.050              | 0.449           | 0.091             | 0.506           | 0.531        | 0.420          | 0.921              | 0.607           | 0.720             |
| 5                | 0.591    | 0.960              | 0.597           | 0.736             | 0.048              | 0.449           | 0.088             | 0.504           | 0.523        | 0.412          | 0.920              | 0.591           | 0.708             |
| Average          | 0.588    | 0.960              | 0.594           | 0.734             | 0.050              | 0.462           | 0.089             | 0.505           | 0.528        | 0.412          | 0.920              | 0.588           | 0.706             |

**C** S1 SVM GAD67 + Nissl

| Cross validation | Accuracy | GAD67(-) precision | GAD67(-) recall | GAD67(-) F1 score | GAD67(+) precision | GAD67(+) recall | GAD67(+) F1 score | Macro precision | Macro recall | Macro F1 score | Weighted precision | Weighted recall | Weighted F1 score |
|------------------|----------|--------------------|-----------------|-------------------|--------------------|-----------------|-------------------|-----------------|--------------|----------------|--------------------|-----------------|-------------------|
| 1                | 0.567    | 0.961              | 0.570           | 0.716             | 0.049              | 0.488           | 0.090             | 0.505           | 0.529        | 0.403          | 0.921              | 0.567           | 0.688             |
| 2                | 0.588    | 0.962              | 0.593           | 0.734             | 0.052              | 0.490           | 0.094             | 0.507           | 0.542        | 0.414          | 0.922              | 0.588           | 0.706             |
| 3                | 0.617    | 0.961              | 0.625           | 0.757             | 0.051              | 0.443           | 0.092             | 0.506           | 0.534        | 0.425          | 0.921              | 0.617           | 0.728             |
| 4                | 0.602    | 0.961              | 0.608           | 0.745             | 0.051              | 0.458           | 0.091             | 0.506           | 0.533        | 0.418          | 0.921              | 0.602           | 0.716             |
| 5                | 0.584    | 0.960              | 0.589           | 0.730             | 0.049              | 0.467           | 0.089             | 0.505           | 0.528        | 0.410          | 0.920              | 0.584           | 0.702             |
| Average          | 0.592    | 0.961              | 0.597           | 0.736             | 0.051              | 0.469           | 0.091             | 0.506           | 0.533        | 0.414          | 0.921              | 0.592           | 0.708             |

**D** S1 SVM GAD67 + NeuN

| Cross validation | Accuracy | GAD67(-) precision | GAD67(-) recall | GAD67(-) F1 score | GAD67(+) precision | GAD67(+) recall | GAD67(+) F1 score | Macro precision | Macro recall | Macro F1 score | Weighted precision | Weighted recall | Weighted F1 score |
|------------------|----------|--------------------|-----------------|-------------------|--------------------|-----------------|-------------------|-----------------|--------------|----------------|--------------------|-----------------|-------------------|
| 1                | 0.550    | 0.961              | 0.552           | 0.701             | 0.049              | 0.508           | 0.090             | 0.505           | 0.530        | 0.395          | 0.921              | 0.550           | 0.674             |
| 2                | 0.585    | 0.962              | 0.589           | 0.731             | 0.051              | 0.486           | 0.093             | 0.506           | 0.538        | 0.412          | 0.922              | 0.585           | 0.703             |
| 3                | 0.613    | 0.961              | 0.621           | 0.754             | 0.051              | 0.447           | 0.092             | 0.506           | 0.534        | 0.423          | 0.921              | 0.613           | 0.725             |
| 4                | 0.596    | 0.961              | 0.602           | 0.740             | 0.051              | 0.471           | 0.093             | 0.506           | 0.536        | 0.416          | 0.922              | 0.596           | 0.712             |
| 5                | 0.571    | 0.960              | 0.575           | 0.719             | 0.049              | 0.482           | 0.089             | 0.505           | 0.528        | 0.404          | 0.921              | 0.571           | 0.692             |
| Average          | 0.583    | 0.961              | 0.588           | 0.729             | 0.050              | 0.479           | 0.091             | 0.506           | 0.533        | 0.410          | 0.921              | 0.583           | 0.701             |

**E**S1 SVM **GAD67**

| Cross validation | Accuracy | GAD67(-) precision | GAD67(-) recall | GAD67(-) F1 score | GAD67(+) precision | GAD67(+) recall | GAD67(+) F1 score | Macro precision | Macro recall | Macro F1 score | Weighted precision | Weighted recall | Weighted F1 score |
|------------------|----------|--------------------|-----------------|-------------------|--------------------|-----------------|-------------------|-----------------|--------------|----------------|--------------------|-----------------|-------------------|
| 1                | 0.591    | 0.961              | 0.597           | 0.736             | 0.050              | 0.467           | 0.091             | 0.505           | 0.532        | 0.413          | 0.921              | 0.591           | 0.708             |
| 2                | 0.609    | 0.962              | 0.616           | 0.751             | 0.053              | 0.469           | 0.095             | 0.507           | 0.542        | 0.423          | 0.922              | 0.609           | 0.722             |
| 3                | 0.631    | 0.962              | 0.639           | 0.768             | 0.053              | 0.441           | 0.094             | 0.507           | 0.540        | 0.431          | 0.922              | 0.631           | 0.739             |
| 4                | 0.606    | 0.961              | 0.613           | 0.748             | 0.051              | 0.458           | 0.092             | 0.506           | 0.535        | 0.420          | 0.921              | 0.606           | 0.720             |
| 5                | 0.571    | 0.959              | 0.576           | 0.720             | 0.047              | 0.460           | 0.086             | 0.503           | 0.518        | 0.403          | 0.919              | 0.571           | 0.692             |
| Average          | 0.602    | 0.961              | 0.608           | 0.745             | 0.051              | 0.459           | 0.092             | 0.506           | 0.533        | 0.418          | 0.921              | 0.602           | 0.716             |

**F**S1 SVM **NeuN**

| Cross validation | Accuracy | GAD67(-) precision | GAD67(-) recall | GAD67(-) F1 score | GAD67(+) precision | GAD67(+) recall | GAD67(+) F1 score | Macro precision | Macro recall | Macro F1 score | Weighted precision | Weighted recall | Weighted F1 score |
|------------------|----------|--------------------|-----------------|-------------------|--------------------|-----------------|-------------------|-----------------|--------------|----------------|--------------------|-----------------|-------------------|
| 1                | 0.515    | 0.960              | 0.514           | 0.670             | 0.048              | 0.531           | 0.087             | 0.504           | 0.523        | 0.379          | 0.920              | 0.515           | 0.644             |
| 2                | 0.552    | 0.962              | 0.553           | 0.703             | 0.051              | 0.527           | 0.093             | 0.507           | 0.540        | 0.398          | 0.923              | 0.552           | 0.676             |
| 3                | 0.580    | 0.960              | 0.585           | 0.727             | 0.049              | 0.469           | 0.089             | 0.505           | 0.527        | 0.408          | 0.920              | 0.580           | 0.699             |
| 4                | 0.591    | 0.961              | 0.596           | 0.736             | 0.050              | 0.469           | 0.091             | 0.506           | 0.533        | 0.414          | 0.921              | 0.591           | 0.708             |
| 5                | 0.570    | 0.959              | 0.575           | 0.719             | 0.048              | 0.467           | 0.087             | 0.504           | 0.521        | 0.403          | 0.919              | 0.570           | 0.691             |
| Average          | 0.562    | 0.961              | 0.565           | 0.711             | 0.049              | 0.492           | 0.089             | 0.505           | 0.529        | 0.400          | 0.921              | 0.562           | 0.684             |

**G**S1 SVM **Nissl**

| Cross validation | Accuracy | GAD67(-) precision | GAD67(-) recall | GAD67(-) F1 score | GAD67(+) precision | GAD67(+) recall | GAD67(+) F1 score | Macro precision | Macro recall | Macro F1 score | Weighted precision | Weighted recall | Weighted F1 score |
|------------------|----------|--------------------|-----------------|-------------------|--------------------|-----------------|-------------------|-----------------|--------------|----------------|--------------------|-----------------|-------------------|
| 1                | 0.583    | 0.959              | 0.589           | 0.730             | 0.047              | 0.447           | 0.086             | 0.503           | 0.518        | 0.408          | 0.919              | 0.583           | 0.701             |
| 2                | 0.621    | 0.960              | 0.631           | 0.761             | 0.050              | 0.421           | 0.089             | 0.505           | 0.526        | 0.425          | 0.920              | 0.621           | 0.732             |
| 3                | 0.646    | 0.960              | 0.658           | 0.781             | 0.051              | 0.402           | 0.090             | 0.505           | 0.530        | 0.435          | 0.920              | 0.646           | 0.750             |
| 4                | 0.621    | 0.959              | 0.631           | 0.761             | 0.048              | 0.404           | 0.085             | 0.503           | 0.517        | 0.423          | 0.919              | 0.621           | 0.731             |
| 5                | 0.614    | 0.959              | 0.623           | 0.755             | 0.048              | 0.413           | 0.085             | 0.503           | 0.518        | 0.420          | 0.919              | 0.614           | 0.726             |
| Average          | 0.617    | 0.959              | 0.626           | 0.757             | 0.049              | 0.417           | 0.087             | 0.504           | 0.522        | 0.422          | 0.919              | 0.617           | 0.728             |

### Supplementary Table 2. Metrics of classification performance of the PCA-SVM model for S1.

**A**, Performance of the PCA-SVM model using anti-GAD67, anti-NeuN, and Nissl signals in S1. **B**, The same as **A**, but using anti-NeuN and Nissl signals. **C**, The same as **A**, but using anti-GAD67 and Nissl signals. **D**, The same as **A**, but using anti-GAD67 and anti-NeuN signals. **E**, The same as **A**, but using an anti-GAD67 signal. **F**, The same as **A**, but using an anti-NeuN signal. **G**, The same as **A**, but using a Nissl signal. *Abbreviations*: S1, primary somatosensory cortex; PCA, principal component analysis; SVM, support vector machine.

**A** M1 FCN GAD67 + NeuN + Nissl

| Cross validation | Accuracy | GAD67(-) precision | GAD67(-) recall | GAD67(-) F1 score | GAD67(+) precision | GAD67(+) recall | GAD67(+) F1 score | Macro precision | Macro recall | Macro F1 score | Weighted precision | Weighted recall | Weighted F1 score |
|------------------|----------|--------------------|-----------------|-------------------|--------------------|-----------------|-------------------|-----------------|--------------|----------------|--------------------|-----------------|-------------------|
| 1                | 0.898    | 0.998              | 0.894           | 0.943             | 0.338              | 0.968           | 0.502             | 0.668           | 0.931        | 0.722          | 0.963              | 0.898           | 0.920             |
| 2                | 0.915    | 0.998              | 0.912           | 0.953             | 0.381              | 0.963           | 0.546             | 0.690           | 0.938        | 0.750          | 0.965              | 0.915           | 0.932             |
| 3                | 0.921    | 0.997              | 0.920           | 0.957             | 0.398              | 0.946           | 0.560             | 0.697           | 0.933        | 0.759          | 0.965              | 0.921           | 0.936             |
| 4                | 0.873    | 0.998              | 0.867           | 0.928             | 0.292              | 0.976           | 0.449             | 0.645           | 0.921        | 0.689          | 0.961              | 0.873           | 0.903             |
| 5                | 0.930    | 0.996              | 0.929           | 0.962             | 0.426              | 0.934           | 0.585             | 0.711           | 0.932        | 0.773          | 0.966              | 0.930           | 0.942             |
| Average          | 0.907    | 0.997              | 0.905           | 0.949             | 0.367              | 0.957           | 0.529             | 0.682           | 0.931        | 0.739          | 0.964              | 0.907           | 0.926             |

**B** M1 FCN NeuN + Nissl

| Cross validation | Accuracy | GAD67(-) precision | GAD67(-) recall | GAD67(-) F1 score | GAD67(+) precision | GAD67(+) recall | GAD67(+) F1 score | Macro precision | Macro recall | Macro F1 score | Weighted precision | Weighted recall | Weighted F1 score |
|------------------|----------|--------------------|-----------------|-------------------|--------------------|-----------------|-------------------|-----------------|--------------|----------------|--------------------|-----------------|-------------------|
| 1                | 0.645    | 0.988              | 0.633           | 0.772             | 0.117              | 0.868           | 0.206             | 0.553           | 0.750        | 0.489          | 0.942              | 0.645           | 0.742             |
| 2                | 0.786    | 0.987              | 0.784           | 0.874             | 0.174              | 0.809           | 0.286             | 0.580           | 0.797        | 0.580          | 0.943              | 0.786           | 0.843             |
| 3                | 0.839    | 0.985              | 0.843           | 0.908             | 0.215              | 0.765           | 0.335             | 0.600           | 0.804        | 0.622          | 0.944              | 0.839           | 0.878             |
| 4                | 0.812    | 0.985              | 0.814           | 0.891             | 0.190              | 0.778           | 0.305             | 0.587           | 0.796        | 0.598          | 0.943              | 0.812           | 0.860             |
| 5                | 0.809    | 0.985              | 0.811           | 0.889             | 0.187              | 0.778           | 0.302             | 0.586           | 0.794        | 0.595          | 0.942              | 0.809           | 0.858             |
| Average          | 0.778    | 0.986              | 0.777           | 0.867             | 0.176              | 0.800           | 0.287             | 0.581           | 0.788        | 0.577          | 0.943              | 0.778           | 0.836             |

**C** M1 FCN GAD67 + Nissl

| Cross validation | Accuracy | GAD67(-) precision | GAD67(-) recall | GAD67(-) F1 score | GAD67(+) precision | GAD67(+) recall | GAD67(+) F1 score | Macro precision | Macro recall | Macro F1 score | Weighted precision | Weighted recall | Weighted F1 score |
|------------------|----------|--------------------|-----------------|-------------------|--------------------|-----------------|-------------------|-----------------|--------------|----------------|--------------------|-----------------|-------------------|
| 1                | 0.952    | 0.991              | 0.958           | 0.974             | 0.532              | 0.839           | 0.651             | 0.761           | 0.899        | 0.813          | 0.966              | 0.952           | 0.957             |
| 2                | 0.848    | 0.997              | 0.842           | 0.913             | 0.254              | 0.959           | 0.401             | 0.626           | 0.900        | 0.657          | 0.958              | 0.848           | 0.886             |
| 3                | 0.934    | 0.995              | 0.935           | 0.964             | 0.443              | 0.912           | 0.596             | 0.719           | 0.924        | 0.780          | 0.965              | 0.934           | 0.945             |
| 4                | 0.930    | 0.996              | 0.930           | 0.962             | 0.428              | 0.939           | 0.588             | 0.712           | 0.934        | 0.775          | 0.966              | 0.930           | 0.942             |
| 5                | 0.916    | 0.995              | 0.916           | 0.954             | 0.382              | 0.920           | 0.539             | 0.688           | 0.918        | 0.747          | 0.962              | 0.916           | 0.932             |
| Average          | 0.916    | 0.995              | 0.916           | 0.953             | 0.408              | 0.914           | 0.555             | 0.701           | 0.915        | 0.754          | 0.964              | 0.916           | 0.932             |

**D** M1 FCN GAD67 + NeuN

| Cross validation | Accuracy | GAD67(-) precision | GAD67(-) recall | GAD67(-) F1 score | GAD67(+) precision | GAD67(+) recall | GAD67(+) F1 score | Macro precision | Macro recall | Macro F1 score | Weighted precision | Weighted recall | Weighted F1 score |
|------------------|----------|--------------------|-----------------|-------------------|--------------------|-----------------|-------------------|-----------------|--------------|----------------|--------------------|-----------------|-------------------|
| 1                | 0.925    | 0.994              | 0.927           | 0.959             | 0.409              | 0.905           | 0.564             | 0.702           | 0.916        | 0.762          | 0.963              | 0.925           | 0.938             |
| 2                | 0.876    | 0.998              | 0.871           | 0.930             | 0.296              | 0.966           | 0.453             | 0.647           | 0.918        | 0.691          | 0.960              | 0.876           | 0.904             |
| 3                | 0.931    | 0.997              | 0.930           | 0.962             | 0.433              | 0.951           | 0.595             | 0.715           | 0.941        | 0.779          | 0.967              | 0.931           | 0.943             |
| 4                | 0.921    | 0.996              | 0.921           | 0.957             | 0.396              | 0.927           | 0.555             | 0.696           | 0.924        | 0.756          | 0.964              | 0.921           | 0.935             |
| 5                | 0.818    | 0.998              | 0.809           | 0.894             | 0.223              | 0.973           | 0.362             | 0.610           | 0.891        | 0.628          | 0.957              | 0.818           | 0.865             |
| Average          | 0.894    | 0.997              | 0.891           | 0.940             | 0.351              | 0.944           | 0.506             | 0.674           | 0.918        | 0.723          | 0.962              | 0.894           | 0.917             |

**E**

M1 FCN GAD67

| Cross validation | Accuracy | GAD67(-) precision | GAD67(-) recall | GAD67(-) F1 score | GAD67(+) precision | GAD67(+) recall | GAD67(+) F1 score | Macro precision | Macro recall | Macro F1 score | Weighted precision | Weighted recall | Weighted F1 score |
|------------------|----------|--------------------|-----------------|-------------------|--------------------|-----------------|-------------------|-----------------|--------------|----------------|--------------------|-----------------|-------------------|
| 1                | 0.933    | 0.990              | 0.938           | 0.963             | 0.430              | 0.839           | 0.569             | 0.710           | 0.888        | 0.766          | 0.961              | 0.933           | 0.942             |
| 2                | 0.922    | 0.992              | 0.925           | 0.957             | 0.393              | 0.870           | 0.542             | 0.693           | 0.898        | 0.750          | 0.960              | 0.922           | 0.935             |
| 3                | 0.907    | 0.993              | 0.908           | 0.949             | 0.351              | 0.892           | 0.504             | 0.672           | 0.900        | 0.726          | 0.959              | 0.907           | 0.925             |
| 4                | 0.900    | 0.994              | 0.900           | 0.945             | 0.335              | 0.897           | 0.488             | 0.664           | 0.899        | 0.716          | 0.959              | 0.900           | 0.920             |
| 5                | 0.907    | 0.994              | 0.908           | 0.949             | 0.354              | 0.902           | 0.508             | 0.674           | 0.905        | 0.729          | 0.960              | 0.907           | 0.925             |
| Average          | 0.914    | 0.993              | 0.916           | 0.953             | 0.373              | 0.880           | 0.522             | 0.683           | 0.898        | 0.737          | 0.960              | 0.914           | 0.930             |

**F**

M1 FCN NeuN

| Cross validation | Accuracy | GAD67(-) precision | GAD67(-) recall | GAD67(-) F1 score | GAD67(+) precision | GAD67(+) recall | GAD67(+) F1 score | Macro precision | Macro recall | Macro F1 score | Weighted precision | Weighted recall | Weighted F1 score |
|------------------|----------|--------------------|-----------------|-------------------|--------------------|-----------------|-------------------|-----------------|--------------|----------------|--------------------|-----------------|-------------------|
| 1                | 0.581    | 0.976              | 0.572           | 0.721             | 0.090              | 0.753           | 0.160             | 0.533           | 0.662        | 0.441          | 0.929              | 0.581           | 0.691             |
| 2                | 0.700    | 0.977              | 0.699           | 0.815             | 0.118              | 0.713           | 0.202             | 0.548           | 0.706        | 0.509          | 0.932              | 0.700           | 0.782             |
| 3                | 0.713    | 0.974              | 0.716           | 0.825             | 0.116              | 0.659           | 0.197             | 0.545           | 0.688        | 0.511          | 0.928              | 0.713           | 0.792             |
| 4                | 0.521    | 0.978              | 0.505           | 0.666             | 0.084              | 0.803           | 0.152             | 0.531           | 0.654        | 0.409          | 0.931              | 0.521           | 0.639             |
| 5                | 0.670    | 0.975              | 0.669           | 0.794             | 0.105              | 0.692           | 0.182             | 0.540           | 0.681        | 0.488          | 0.929              | 0.670           | 0.761             |
| Average          | 0.637    | 0.976              | 0.632           | 0.764             | 0.102              | 0.724           | 0.179             | 0.539           | 0.678        | 0.471          | 0.930              | 0.637           | 0.733             |

**G**

M1 FCN Nissl

| Cross validation | Accuracy | GAD67(-) precision | GAD67(-) recall | GAD67(-) F1 score | GAD67(+) precision | GAD67(+) recall | GAD67(+) F1 score | Macro precision | Macro recall | Macro F1 score | Weighted precision | Weighted recall | Weighted F1 score |
|------------------|----------|--------------------|-----------------|-------------------|--------------------|-----------------|-------------------|-----------------|--------------|----------------|--------------------|-----------------|-------------------|
| 1                | 0.583    | 0.975              | 0.574           | 0.723             | 0.089              | 0.735           | 0.158             | 0.532           | 0.655        | 0.441          | 0.927              | 0.583           | 0.693             |
| 2                | 0.643    | 0.977              | 0.639           | 0.772             | 0.102              | 0.729           | 0.178             | 0.539           | 0.684        | 0.475          | 0.930              | 0.643           | 0.741             |
| 3                | 0.646    | 0.977              | 0.642           | 0.774             | 0.102              | 0.729           | 0.179             | 0.540           | 0.685        | 0.477          | 0.930              | 0.646           | 0.743             |
| 4                | 0.322    | 0.983              | 0.289           | 0.447             | 0.067              | 0.912           | 0.125             | 0.525           | 0.600        | 0.286          | 0.935              | 0.322           | 0.430             |
| 5                | 0.707    | 0.973              | 0.710           | 0.821             | 0.111              | 0.645           | 0.190             | 0.542           | 0.677        | 0.505          | 0.927              | 0.707           | 0.787             |
| Average          | 0.580    | 0.977              | 0.571           | 0.707             | 0.094              | 0.750           | 0.166             | 0.536           | 0.660        | 0.437          | 0.930              | 0.580           | 0.679             |

### Supplementary Table 3. Metrics of classification performance of the FCN-based model for M1.

*A*, Performance of the FCN-based model using anti-GAD67, anti-NeuN, and Nissl signals in M1. *B*, The same as *A*, but using anti-NeuN and Nissl signals. *C*, The same as *A*, but using anti-GAD67 and Nissl signals. *D*, The same as *A*, but using anti-GAD67 and anti-NeuN signals. *E*, The same as *A*, but using an anti-GAD67 signal. *F*, The same as *A*, but using an anti-NeuN signal. *G*, The same as *A*, but using a Nissl signal. *Abbreviations*: M1, primary motor cortex; FCN, fully convolutional network.

**A** M1 SVM GAD67 + NeuN + Nissl

| Cross validation | Accuracy | GAD67(-) precision | GAD67(-) recall | GAD67(-) F1 score | GAD67(+) precision | GAD67(+) recall | GAD67(+) F1 score | Macro precision | Macro recall | Macro F1 score | Weighted precision | Weighted recall | Weighted F1 score |
|------------------|----------|--------------------|-----------------|-------------------|--------------------|-----------------|-------------------|-----------------|--------------|----------------|--------------------|-----------------|-------------------|
| 1                | 0.476    | 0.951              | 0.471           | 0.630             | 0.057              | 0.567           | 0.103             | 0.504           | 0.519        | 0.366          | 0.903              | 0.476           | 0.602             |
| 2                | 0.513    | 0.952              | 0.511           | 0.665             | 0.058              | 0.540           | 0.105             | 0.505           | 0.526        | 0.385          | 0.905              | 0.513           | 0.635             |
| 3                | 0.498    | 0.951              | 0.495           | 0.651             | 0.057              | 0.548           | 0.104             | 0.504           | 0.521        | 0.377          | 0.904              | 0.498           | 0.622             |
| 4                | 0.518    | 0.953              | 0.517           | 0.670             | 0.059              | 0.540           | 0.107             | 0.506           | 0.529        | 0.388          | 0.905              | 0.518           | 0.640             |
| 5                | 0.556    | 0.952              | 0.559           | 0.705             | 0.059              | 0.496           | 0.106             | 0.506           | 0.528        | 0.405          | 0.905              | 0.556           | 0.673             |
| Average          | 0.512    | 0.952              | 0.511           | 0.664             | 0.058              | 0.538           | 0.105             | 0.505           | 0.525        | 0.385          | 0.904              | 0.512           | 0.634             |

**B** M1 SVM NeuN + Nissl

| Cross validation | Accuracy | GAD67(-) precision | GAD67(-) recall | GAD67(-) F1 score | GAD67(+) precision | GAD67(+) recall | GAD67(+) F1 score | Macro precision | Macro recall | Macro F1 score | Weighted precision | Weighted recall | Weighted F1 score |
|------------------|----------|--------------------|-----------------|-------------------|--------------------|-----------------|-------------------|-----------------|--------------|----------------|--------------------|-----------------|-------------------|
| 1                | 0.456    | 0.949              | 0.449           | 0.610             | 0.055              | 0.570           | 0.100             | 0.502           | 0.510        | 0.355          | 0.902              | 0.456           | 0.583             |
| 2                | 0.497    | 0.952              | 0.494           | 0.651             | 0.058              | 0.555           | 0.105             | 0.505           | 0.525        | 0.378          | 0.904              | 0.497           | 0.622             |
| 3                | 0.504    | 0.953              | 0.502           | 0.657             | 0.059              | 0.555           | 0.106             | 0.506           | 0.528        | 0.382          | 0.905              | 0.504           | 0.628             |
| 4                | 0.512    | 0.951              | 0.510           | 0.664             | 0.058              | 0.533           | 0.104             | 0.504           | 0.522        | 0.384          | 0.904              | 0.512           | 0.635             |
| 5                | 0.551    | 0.952              | 0.554           | 0.700             | 0.060              | 0.506           | 0.107             | 0.506           | 0.530        | 0.404          | 0.905              | 0.551           | 0.669             |
| Average          | 0.504    | 0.951              | 0.502           | 0.656             | 0.058              | 0.544           | 0.104             | 0.505           | 0.523        | 0.380          | 0.904              | 0.504           | 0.627             |

**C** M1 SVM GAD67 + Nissl

| Cross validation | Accuracy | GAD67(-) precision | GAD67(-) recall | GAD67(-) F1 score | GAD67(+) precision | GAD67(+) recall | GAD67(+) F1 score | Macro precision | Macro recall | Macro F1 score | Weighted precision | Weighted recall | Weighted F1 score |
|------------------|----------|--------------------|-----------------|-------------------|--------------------|-----------------|-------------------|-----------------|--------------|----------------|--------------------|-----------------|-------------------|
| 1                | 0.496    | 0.950              | 0.493           | 0.649             | 0.056              | 0.538           | 0.102             | 0.503           | 0.516        | 0.376          | 0.903              | 0.496           | 0.620             |
| 2                | 0.556    | 0.951              | 0.560           | 0.705             | 0.059              | 0.489           | 0.105             | 0.505           | 0.524        | 0.405          | 0.904              | 0.556           | 0.673             |
| 3                | 0.542    | 0.950              | 0.545           | 0.692             | 0.057              | 0.489           | 0.102             | 0.503           | 0.517        | 0.397          | 0.903              | 0.542           | 0.661             |
| 4                | 0.542    | 0.950              | 0.545           | 0.692             | 0.057              | 0.487           | 0.101             | 0.503           | 0.516        | 0.397          | 0.902              | 0.542           | 0.661             |
| 5                | 0.597    | 0.950              | 0.606           | 0.740             | 0.058              | 0.435           | 0.103             | 0.504           | 0.521        | 0.422          | 0.903              | 0.597           | 0.706             |
| Average          | 0.546    | 0.950              | 0.550           | 0.696             | 0.057              | 0.488           | 0.103             | 0.504           | 0.519        | 0.399          | 0.903              | 0.546           | 0.664             |

**D** M1 SVM GAD67 + NeuN

| Cross validation | Accuracy | GAD67(-) precision | GAD67(-) recall | GAD67(-) F1 score | GAD67(+) precision | GAD67(+) recall | GAD67(+) F1 score | Macro precision | Macro recall | Macro F1 score | Weighted precision | Weighted recall | Weighted F1 score |
|------------------|----------|--------------------|-----------------|-------------------|--------------------|-----------------|-------------------|-----------------|--------------|----------------|--------------------|-----------------|-------------------|
| 1                | 0.515    | 0.951              | 0.514           | 0.667             | 0.058              | 0.533           | 0.105             | 0.505           | 0.523        | 0.386          | 0.904              | 0.515           | 0.637             |
| 2                | 0.659    | 0.950              | 0.676           | 0.790             | 0.060              | 0.369           | 0.103             | 0.505           | 0.522        | 0.446          | 0.903              | 0.659           | 0.753             |
| 3                | 0.563    | 0.952              | 0.567           | 0.711             | 0.060              | 0.489           | 0.106             | 0.506           | 0.528        | 0.408          | 0.904              | 0.563           | 0.678             |
| 4                | 0.603    | 0.949              | 0.613           | 0.745             | 0.057              | 0.418           | 0.101             | 0.503           | 0.516        | 0.423          | 0.902              | 0.603           | 0.711             |
| 5                | 0.705    | 0.952              | 0.726           | 0.823             | 0.065              | 0.342           | 0.110             | 0.509           | 0.534        | 0.467          | 0.905              | 0.705           | 0.785             |
| Average          | 0.609    | 0.951              | 0.619           | 0.747             | 0.060              | 0.430           | 0.105             | 0.505           | 0.525        | 0.426          | 0.904              | 0.609           | 0.713             |



**E**M1 SVM **GAD67**

| Cross validation | Accuracy | GAD67(-) precision | GAD67(-) recall | GAD67(-) F1 score | GAD67(+) precision | GAD67(+) recall | GAD67(+) F1 score | Macro precision | Macro recall | Macro F1 score | Weighted precision | Weighted recall | Weighted F1 score |
|------------------|----------|--------------------|-----------------|-------------------|--------------------|-----------------|-------------------|-----------------|--------------|----------------|--------------------|-----------------|-------------------|
| 1                | 0.501    | 0.951              | 0.499           | 0.654             | 0.057              | 0.543           | 0.104             | 0.504           | 0.521        | 0.379          | 0.904              | 0.501           | 0.625             |
| 2                | 0.743    | 0.950              | 0.769           | 0.850             | 0.064              | 0.281           | 0.104             | 0.507           | 0.525        | 0.477          | 0.903              | 0.743           | 0.811             |
| 3                | 0.719    | 0.949              | 0.742           | 0.833             | 0.061              | 0.296           | 0.100             | 0.505           | 0.519        | 0.467          | 0.902              | 0.719           | 0.794             |
| 4                | 0.671    | 0.948              | 0.690           | 0.799             | 0.056              | 0.328           | 0.096             | 0.502           | 0.509        | 0.447          | 0.901              | 0.671           | 0.761             |
| 5                | 0.781    | 0.951              | 0.811           | 0.875             | 0.071              | 0.257           | 0.111             | 0.511           | 0.534        | 0.493          | 0.904              | 0.781           | 0.835             |
| Average          | 0.683    | 0.950              | 0.702           | 0.802             | 0.062              | 0.341           | 0.103             | 0.506           | 0.522        | 0.453          | 0.903              | 0.683           | 0.765             |

**F**M1 SVM **NeuN**

| Cross validation | Accuracy | GAD67(-) precision | GAD67(-) recall | GAD67(-) F1 score | GAD67(+) precision | GAD67(+) recall | GAD67(+) F1 score | Macro precision | Macro recall | Macro F1 score | Weighted precision | Weighted recall | Weighted F1 score |
|------------------|----------|--------------------|-----------------|-------------------|--------------------|-----------------|-------------------|-----------------|--------------|----------------|--------------------|-----------------|-------------------|
| 1                | 0.497    | 0.950              | 0.495           | 0.651             | 0.057              | 0.540           | 0.103             | 0.504           | 0.518        | 0.377          | 0.903              | 0.497           | 0.622             |
| 2                | 0.467    | 0.953              | 0.459           | 0.620             | 0.058              | 0.597           | 0.106             | 0.506           | 0.528        | 0.363          | 0.906              | 0.467           | 0.593             |
| 3                | 0.478    | 0.951              | 0.473           | 0.631             | 0.056              | 0.562           | 0.103             | 0.504           | 0.518        | 0.367          | 0.903              | 0.478           | 0.603             |
| 4                | 0.515    | 0.954              | 0.513           | 0.667             | 0.060              | 0.557           | 0.109             | 0.507           | 0.535        | 0.388          | 0.906              | 0.515           | 0.637             |
| 5                | 0.610    | 0.953              | 0.618           | 0.750             | 0.062              | 0.452           | 0.110             | 0.508           | 0.535        | 0.430          | 0.905              | 0.610           | 0.716             |
| Average          | 0.513    | 0.952              | 0.512           | 0.664             | 0.059              | 0.542           | 0.106             | 0.505           | 0.527        | 0.385          | 0.905              | 0.513           | 0.634             |

**G**M1 SVM **Nissl**

| Cross validation | Accuracy | GAD67(-) precision | GAD67(-) recall | GAD67(-) F1 score | GAD67(+) precision | GAD67(+) recall | GAD67(+) F1 score | Macro precision | Macro recall | Macro F1 score | Weighted precision | Weighted recall | Weighted F1 score |
|------------------|----------|--------------------|-----------------|-------------------|--------------------|-----------------|-------------------|-----------------|--------------|----------------|--------------------|-----------------|-------------------|
| 1                | 0.455    | 0.950              | 0.449           | 0.609             | 0.055              | 0.575           | 0.101             | 0.502           | 0.512        | 0.355          | 0.902              | 0.455           | 0.582             |
| 2                | 0.516    | 0.952              | 0.515           | 0.668             | 0.058              | 0.533           | 0.105             | 0.505           | 0.524        | 0.387          | 0.904              | 0.516           | 0.638             |
| 3                | 0.540    | 0.951              | 0.542           | 0.691             | 0.058              | 0.499           | 0.103             | 0.504           | 0.520        | 0.397          | 0.903              | 0.540           | 0.659             |
| 4                | 0.506    | 0.951              | 0.504           | 0.659             | 0.057              | 0.533           | 0.103             | 0.504           | 0.519        | 0.381          | 0.903              | 0.506           | 0.630             |
| 5                | 0.478    | 0.950              | 0.474           | 0.632             | 0.056              | 0.560           | 0.102             | 0.503           | 0.517        | 0.367          | 0.903              | 0.478           | 0.604             |
| Average          | 0.499    | 0.951              | 0.497           | 0.652             | 0.057              | 0.540           | 0.103             | 0.504           | 0.518        | 0.377          | 0.903              | 0.499           | 0.623             |

**Supplementary Table 4. Metrics of classification performance of the PCA-SVM model for M1.**

**A**, Performance of the PCA-SVM model using anti-GAD67, anti-NeuN, and Nissl signals in M1. **B**, The same as **A**, but using anti-NeuN and Nissl signals. **C**, The same as **A**, but using anti-GAD67 and Nissl signals. **D**, The same as **A**, but using anti-GAD67 and anti-NeuN signals. **E**, The same as **A**, but using an anti-GAD67 signal. **F**, The same as **A**, but using an anti-NeuN signal. **G**, The same as **A**, but using a Nissl signal. *Abbreviations*: M1, primary motor cortex; PCA, principal component analysis; SVM, support vector machine.

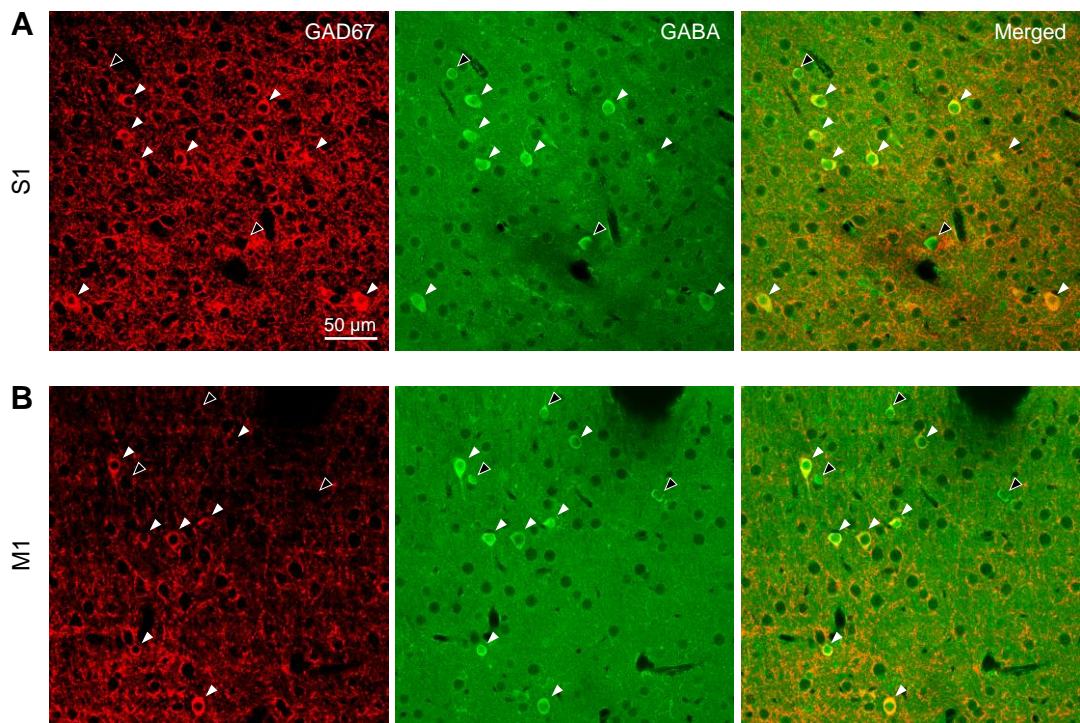

**Supplementary Figure 1. Representative photographs of GAD67 and GABA immunoreactivity in S1 and M1.** *A*, Representative image (2048 × 2048 pixels, 16-bit intensity, 40×) of a section of S1 immunostained for GAD67 (*red, leftmost (first)*) and GABA (*green, second*). A merged image is shown in the *third* panel. Cells double-immunopositive for GAD67 and GABA are indicated by *white* arrowheads, whereas GABA-immunopositive (but GAD67-immunonegative) cells are indicated by *black* arrowheads. *B*, The same as *A*, but for M1. Note that we used rabbit primary antibody against GABA (1:500, A2052, Merck, NJ, USA) for GABA-immunostaining. *Abbreviations*: S1, primary somatosensory cortex; M1, primary motor cortex.

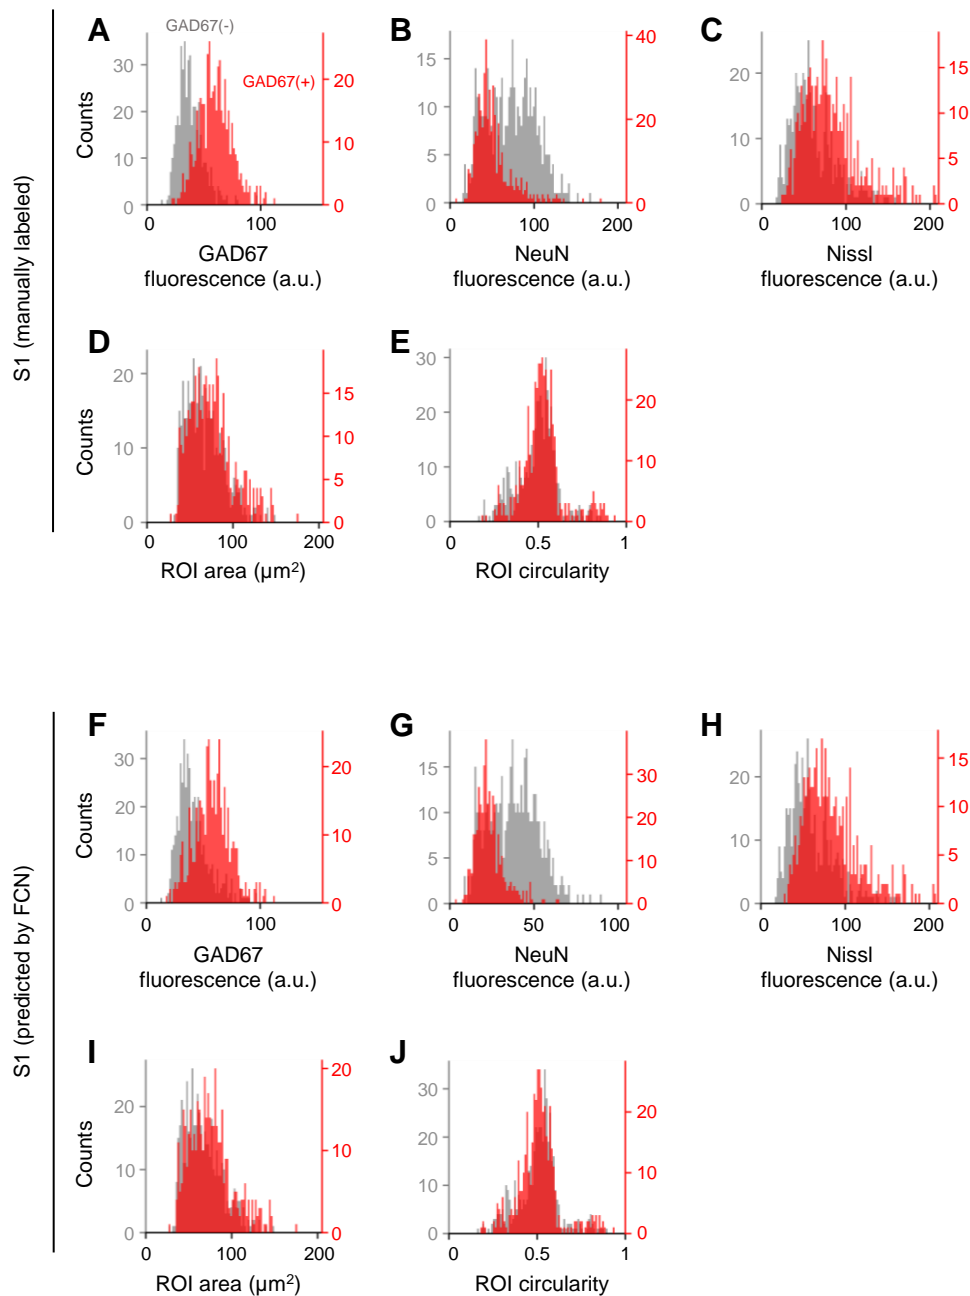

**Supplementary Figure 2. Differences in the immunofluorescence and shape of GAD67-positive and GAD67-negative cells in S1 manually as annotated or predicted by deep learning.** *A*, Histogram of the fluorescence of anti-GAD67 signals from manually annotated GAD67-positive (*red*) and -negative (*gray*) neurons in S1. *B*, The same as *A*, but for anti-NeuN immunofluorescence signals. *C*, The same as *A*, but for Nissl fluorescence signals. *D*, The same as *A*, but for the area of individual neurons (*i.e.*, ROIs). *E*, The same as *A*, but for the circularity of individual neurons (*i.e.*, ROIs). *F–J*, The same as *A–E*, respectively, but for the cell images predicted by the FCN model pretrained on NeuN and Nissl fluorescence. *Abbreviations*: S1, primary somatosensory cortex; FCN, fully convolutional network; ROI, region of interest.

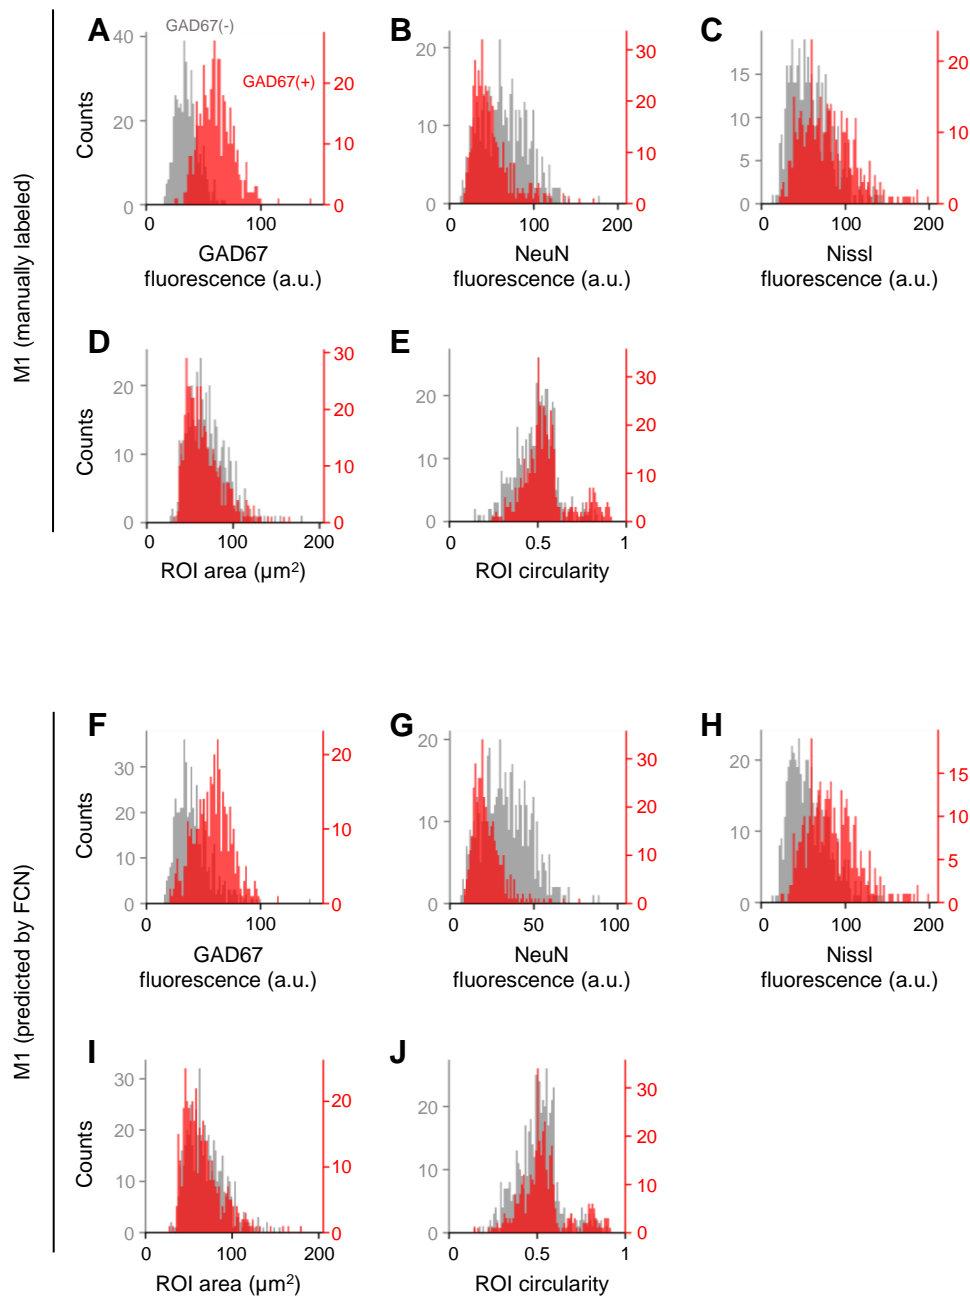

**Supplementary Figure 3. Differences in the immunofluorescence and shape of GAD67-positive and GAD67-negative cells in M1 as manually annotated or predicted by deep learning.** *A*, Histogram of the fluorescence of anti-GAD67 signals from manually annotated GAD67-positive (*red*) and -negative (*gray*) neurons in M1. *B*, The same as *A*, but for anti-NeuN immunofluorescence signals. *C*, The same as *A*, but for Nissl fluorescence signals. *D*, The same as *A*, but for the area of individual neurons (*i.e.*, ROIs). *E*, The same as *A*, but for the circularity of individual neurons (*i.e.*, ROIs). *F–J*, The same as *A–E*, respectively, but for the cell images predicted by the FCN model pretrained on NeuN and Nissl fluorescence. *Abbreviations*: M1, primary motor cortex; FCN, fully convolutional network; ROI, region of interest.

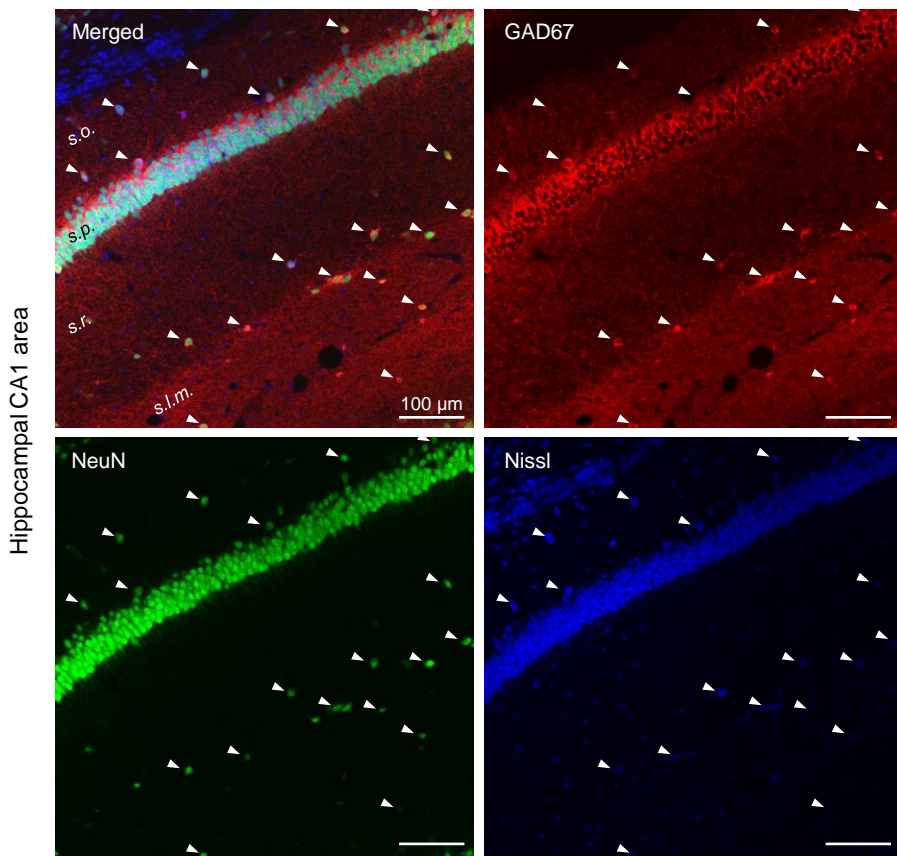

**Supplementary Figure 4. Representative photographs of GAD67 and NeuN immunoreactivity and Nissl reactivity in the hippocampal CA1 area.** Representative fluorescence image (1024 × 1024 pixels, 16-bit intensity, 20×) of the hippocampal CA1 area. These sections were immunostained for GAD67 (*top right (red)*) and NeuN (*bottom left (green)*) and stained for Nissl substances (*bottom right (blue)*). A merged image is displayed in the *top left* panel. GAD67-immunopositive cells are indicated by *white* arrowheads. *Abbreviations: s.o., stratum oriens; s.p., stratum pyramidale; s.r., stratum radiatum; s.l.m., stratum lacunosum moleculare.*

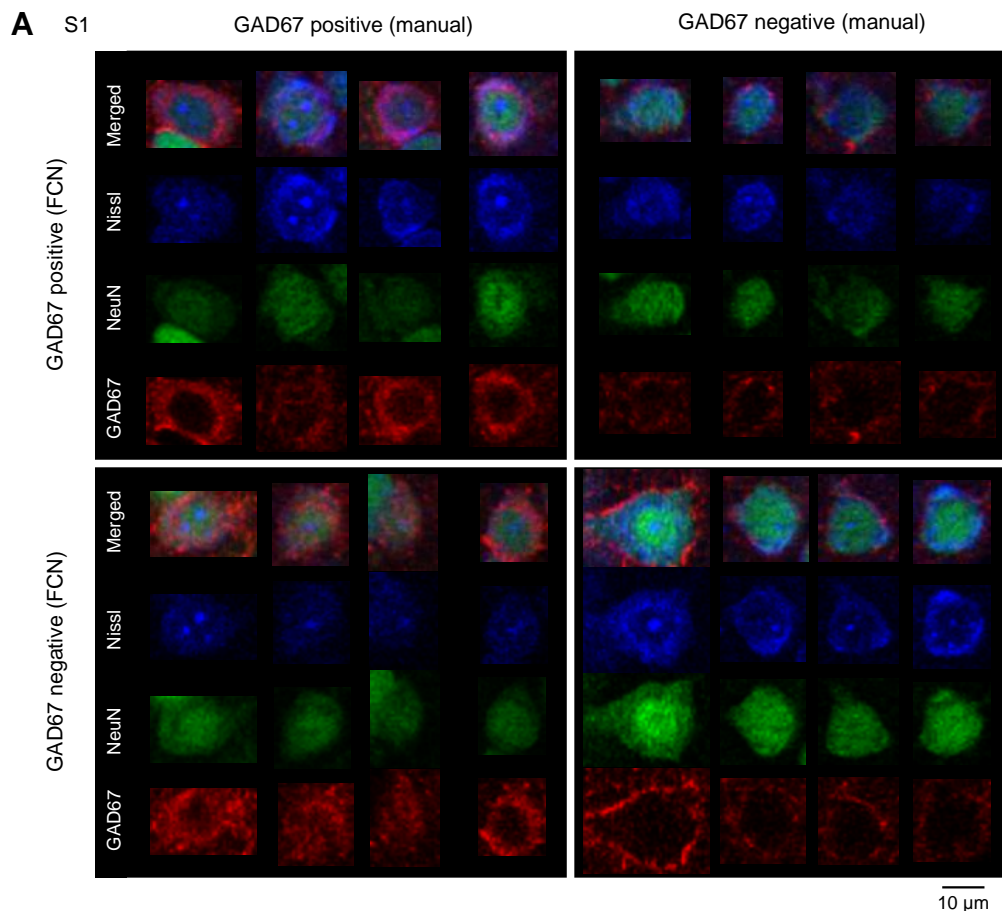

**Supplementary Figure 5. Representative photographs of GAD67 and NeuN immunoreactivity and Nissl reactivity in single neocortical cells categorized by experimenters and deep learning.** *A, Top left:* Representative fluorescence images of four S1 neurons that were manually labeled as positive and predicted as positive by the FCN model pretrained on NeuN-immunofluorescence and Nissl-fluorescence images. The cells were immunostained for GAD67 (red), NeuN (green), and Nissl (blue). *Top right:* The same as *top left*, but for cell images that were manually annotated as negative but predicted as positive by the FCN model. *Bottom left:* The same as *top left*, but for cell images that were manually annotated as positive but predicted as negative by the FCN model. *Bottom right:* The same as *top left*, but for cell images that were manually annotated as negative and predicted as negative by the FCN model. *Abbreviations:* S1, primary somatosensory cortex; FCN, fully convolutional network.



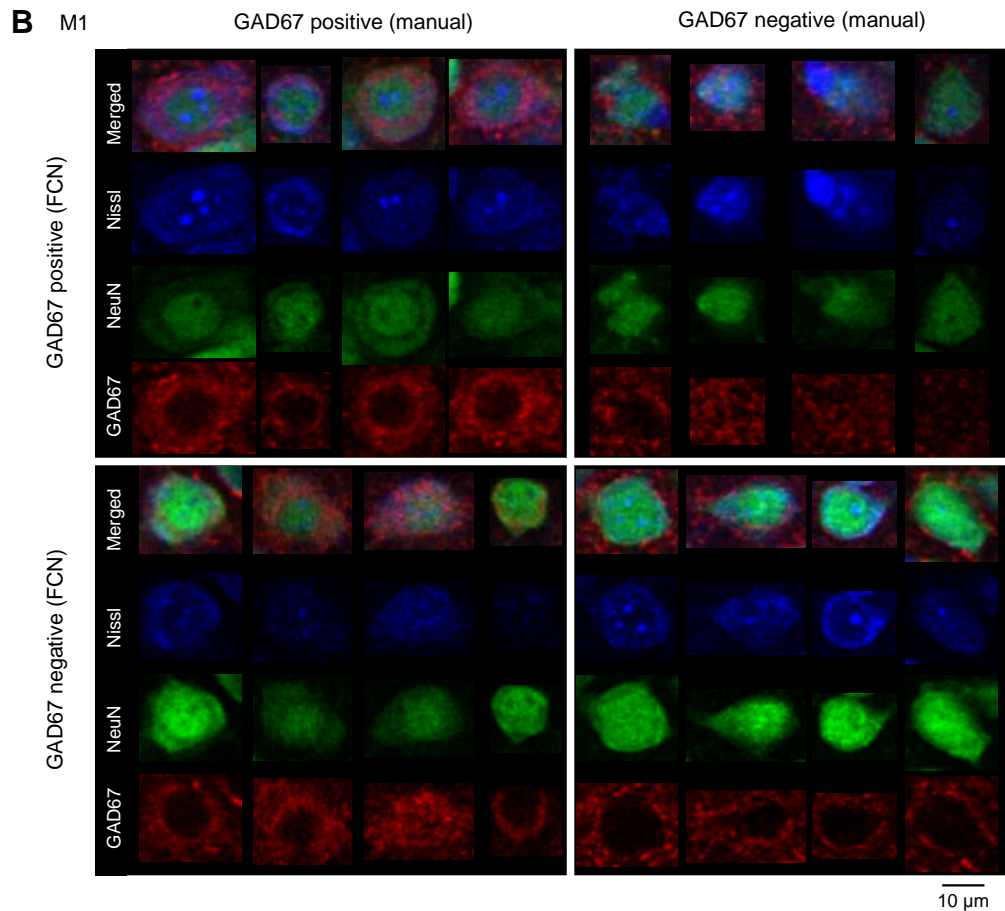

**Supplementary Figure 5. Representative photographs of GAD67 and NeuN immunoreactivity and Nissl reactivity in single neocortical cells categorized by experimenters and deep learning (continued from the previous page). *B*, The same as *A*, but for M1 neurons. *Abbreviations*: M1, primary motor cortex; FCN, fully convolutional network.**
